# Supplementary material for: Accurate Detection of HPV Integration Sites in Cervical Cancer Samples Using the Nanopore MinION Sequencer Without Error Correction
Source: PubMed Central journal article supplement (PMC7344299; doi:10.3389/fgene.2020.00660), 2020-06-26

**Figure S1.** Sequence depth coverage diagram of Illumina and nanopore results on HPV16 genome.

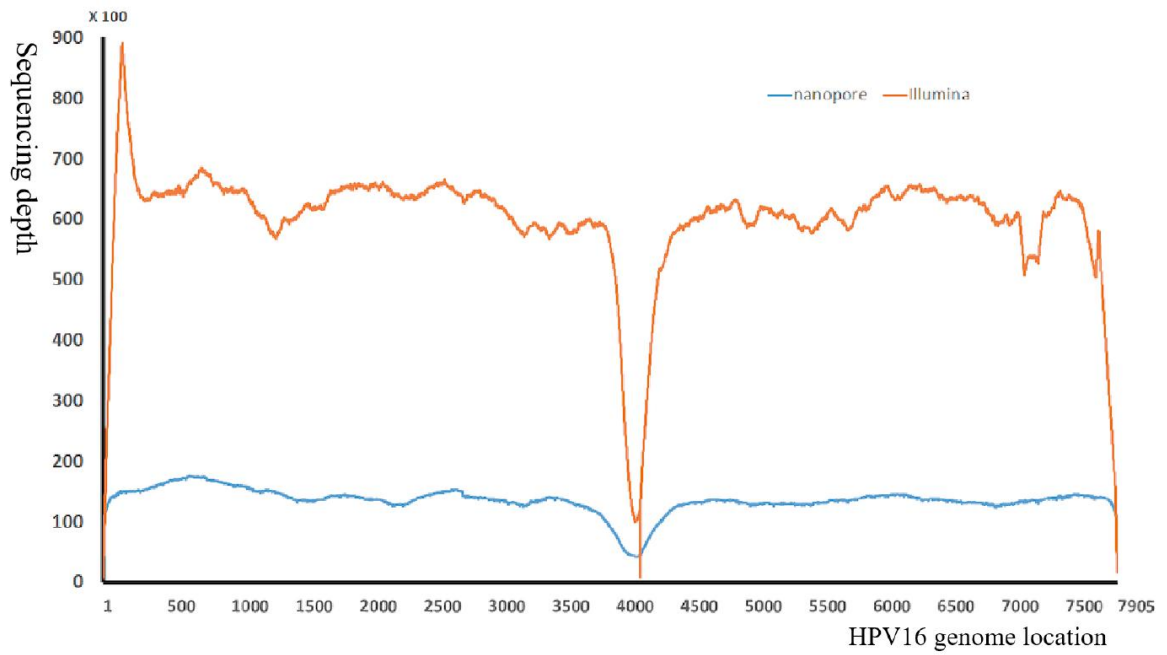

**Figure S2.** Sanger sequencing chrome image of all 13 verified integration sites.

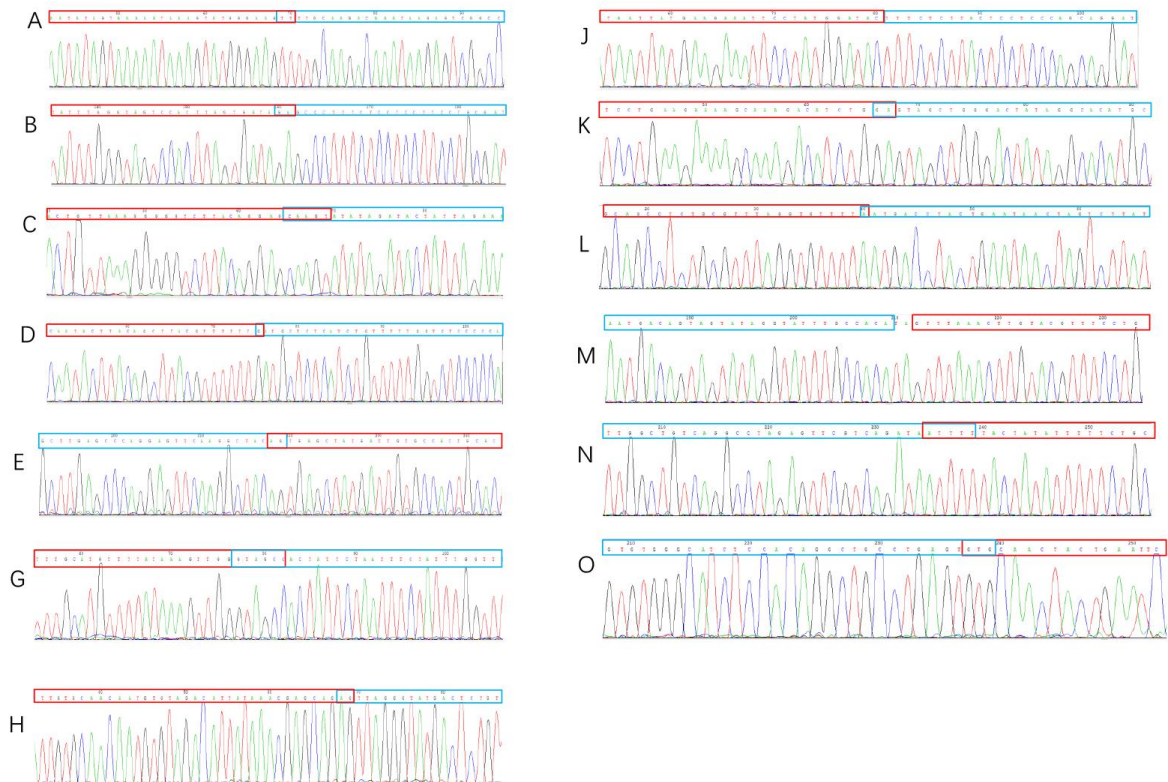

**Figure S3.** Function classification of the unique integrated genes.

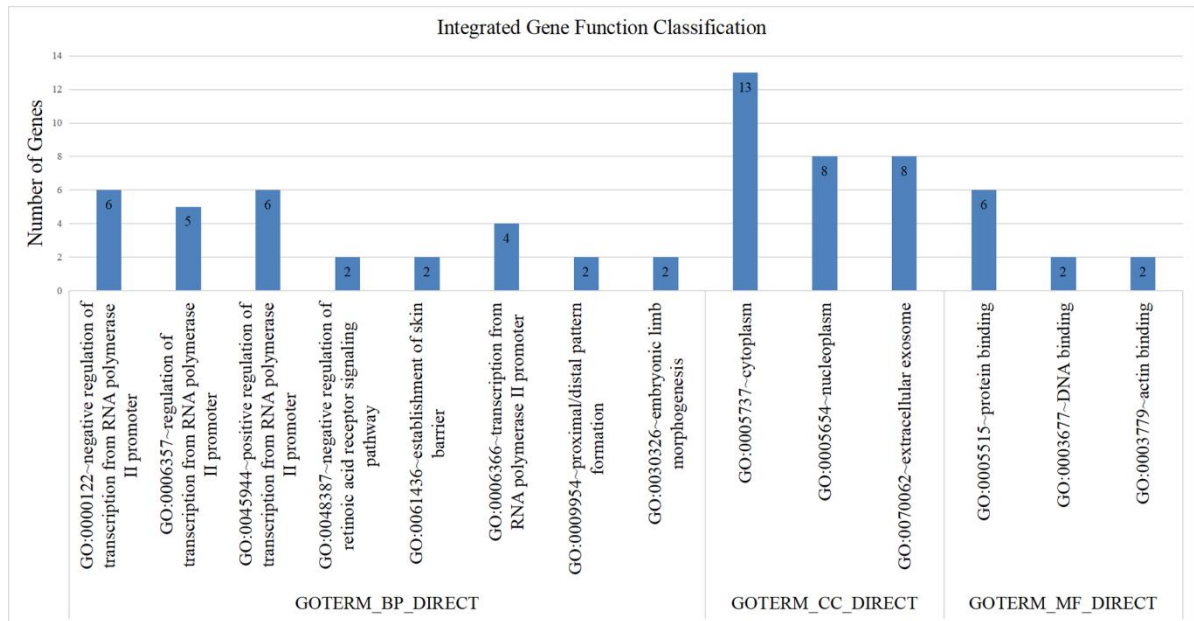

Supplement: Presentation_1.pdf [file Presentation_1.pdf]
